# Supplementary material for: Genome-Wide Association Meta-analysis of Neuropathologic Features of Alzheimer's Disease and Related Dementias
Source: PubMed Central journal article supplement (PMC4154667; doi:10.1371/journal.pgen.1004606), 2014-09-04
Supplement: pgen.1004606.s024.pdf [file pgen.1004606.s024.pdf]

Table S2: Top association signals from the complete case-control phenotype

| Marker       | Chr | Position    | EA | RA | Freq   | minFreq | maxFreq | Effect  | StdErr | Pval     | Direction | Gene    |
|--------------|-----|-------------|----|----|--------|---------|---------|---------|--------|----------|-----------|---------|
| rs6857       | 19  | 45,392,254  | T  | C  | 0.2864 | 0.1465  | 0.3786  | 1.501   | 0.1162 | 3.48E-38 | +++++--   | PVRL2   |
| 22-45354131  | 22  | 45,354,131  | A  | G  | 0.0172 | 0.0172  | 0.0172  | -2.4069 | 0.4288 | 2.00E-08 | ?-?????   | PHF21B  |
| 11-37229442  | 11  | 37,229,442  | C  | T  | 0.9858 | 0.9858  | 0.9858  | 1.8518  | 0.3497 | 1.19E-07 | ?+?????   | none    |
| rs41526548   | 9   | 94,891,778  | C  | T  | 0.7663 | 0.7427  | 0.7745  | -0.6776 | 0.1393 | 1.16E-06 | ??-?--?   | none    |
| 16-87690482  | 16  | 87,690,482  | T  | C  | 0.0116 | 0.0116  | 0.012   | -2.0377 | 0.4245 | 1.59E-06 | --?????   | JPH3    |
| rs3779483    | 7   | 95,455,845  | T  | C  | 0.0554 | 0.0554  | 0.0554  | -1.2911 | 0.2717 | 2.01E-06 | ?-?????   | DYNC111 |
| rs7453498    | 6   | 32,446,717  | C  | T  | 0.8656 | 0.8415  | 0.8992  | 0.8142  | 0.1746 | 3.09E-06 | --+??+?   | none    |
| rs6822736    | 4   | 54,541,846  | C  | A  | 0.6565 | 0.6486  | 0.6751  | -0.3637 | 0.0785 | 3.59E-06 | -----     | none    |
| rs4846835    | 1   | 230,281,156 | A  | G  | 0.1984 | 0.1844  | 0.228   | -0.4595 | 0.1    | 4.33E-06 | -----     | GALNT2  |
| rs35862341   | 14  | 56,361,738  | C  | T  | 0.9866 | 0.963   | 0.9874  | 1.521   | 0.3312 | 4.39E-06 | --+?+??+  | none    |
| rs8105265    | 19  | 2,920,705   | A  | G  | 0.1173 | 0.0954  | 0.1541  | -0.5203 | 0.1133 | 4.39E-06 | -----     | none    |
| rs6665019    | 1   | 25,328,009  | A  | G  | 0.1211 | 0.0866  | 0.2252  | -0.5008 | 0.1096 | 4.90E-06 | -----     | none    |
| 12-34593353  | 12  | 34,593,353  | A  | C  | 0.0745 | 0.0745  | 0.0745  | -1.2739 | 0.2798 | 5.28E-06 | ?-?????   | none    |
| rs3003214    | 1   | 244,605,036 | A  | G  | 0.3176 | 0.2266  | 0.3385  | 0.37    | 0.0813 | 5.31E-06 | +++++++   | ADSS    |
| rs34487851   | 2   | 106,642,554 | G  | A  | 0.7378 | 0.6808  | 0.7924  | 0.4164  | 0.0916 | 5.47E-06 | +++++++   | none    |
| 6-106452945  | 6   | 106,452,945 | C  | A  | 0.987  | 0.9843  | 0.9877  | 2.2238  | 0.4902 | 5.72E-06 | ?+?+???   | none    |
| 8-3777515    | 8   | 3,777,515   | C  | T  | 0.965  | 0.965   | 0.965   | 1.6673  | 0.3677 | 5.77E-06 | ?+?????   | CSMD1   |
| 21-43693789  | 21  | 43,693,789  | A  | G  | 0.011  | 0.0108  | 0.0164  | -1.6439 | 0.3648 | 6.60E-06 | --+???    | ABCG1   |
| 14-97513230  | 14  | 97,513,230  | T  | C  | 0.0665 | 0.0665  | 0.0665  | -1.0557 | 0.2347 | 6.84E-06 | ?-?????   | none    |
| rs8037790    | 15  | 92,542,831  | A  | G  | 0.23   | 0.2083  | 0.2685  | -0.443  | 0.0988 | 7.39E-06 | -----     | SLCO3A1 |
| 14-35114172  | 14  | 35,114,172  | A  | G  | 0.0185 | 0.0142  | 0.0194  | -1.5867 | 0.3554 | 8.03E-06 | --?--?    | none    |
| 10-115495938 | 10  | 115,495,938 | G  | A  | 0.9881 | 0.9879  | 0.9897  | 1.6516  | 0.3713 | 8.68E-06 | ?+??+??   | none    |
| 1-96582508   | 1   | 96,582,508  | A  | G  | 0.0142 | 0.0101  | 0.0166  | -1.6052 | 0.3615 | 8.96E-06 | ?-?-?-?   | none    |
| rs7297677    | 12  | 78,852,366  | T  | C  | 0.0431 | 0.0301  | 0.0502  | -0.7249 | 0.1638 | 9.58E-06 | -----+    | none    |

Chr: chromosome number; EA: effect allele; RA: reference allele; Freq: frequency of effect allele; min/maxFreq: the minimum and maximum within cohort allele frequency; Effect: allele effect, in terms of the beta coefficient
