# Supplementary material for: Genome-Wide Association Meta-analysis of Neuropathologic Features of Alzheimer's Disease and Related Dementias
Source: PubMed Central journal article supplement (PMC4154667; doi:10.1371/journal.pgen.1004606), 2014-09-04
Supplement: pgen.1004606.s025.pdf [file pgen.1004606.s025.pdf]

Table S3: Top association signals from the neurofibrillary tangle (NFT) Braak ordinal I phenotype

| Marker      | Chr | Position       | EA | RA | Freq   | minFreq | maxFreq | Effect  | StdErr | Pval     | Direction  | Gene     |
|-------------|-----|----------------|----|----|--------|---------|---------|---------|--------|----------|------------|----------|
| rs6857      | 19  | 45,392,254.00  | T  | C  | 0.3285 | 0.1484  | 0.3913  | 0.6632  | 0.046  | 4.73E-47 | +++++++?+  | PVRL2    |
| 7-102030935 | 7   | 102,030,935.00 | A  | C  | 0.0178 | 0.0148  | 0.0201  | -3.9538 | 0.7922 | 6.02E-07 | -??-?????  | none     |
| rs4975209   | 4   | 130,236,771.00 | C  | T  | 0.7774 | 0.7488  | 0.8147  | -0.2237 | 0.0465 | 1.49E-06 | -----++    | none     |
| rs34746873  | 8   | 62,898,949.00  | G  | A  | 0.5884 | 0.5519  | 0.6436  | -0.1865 | 0.0391 | 1.85E-06 | -----++    | none     |
| rs9309711   | 2   | 3,472,138.00   | C  | T  | 0.7072 | 0.6864  | 0.7295  | 0.2055  | 0.0441 | 3.24E-06 | -++-++++-  | TTC15    |
| rs12446940  | 16  | 3,962,620.00   | A  | G  | 0.3563 | 0.2727  | 0.3947  | 0.1929  | 0.0418 | 3.94E-06 | +++++++?+  | none     |
| rs10009321  | 4   | 130,236,228.00 | G  | T  | 0.796  | 0.7518  | 0.8237  | -0.2186 | 0.0474 | 4.00E-06 | -----++    | none     |
| rs12529314  | 6   | 164,343,726.00 | T  | C  | 0.1725 | 0.1558  | 0.229   | -0.2433 | 0.0528 | 4.03E-06 | --+-----   | none     |
| 1-107549757 | 1   | 107,549,757.00 | T  | C  | 0.0342 | 0.0272  | 0.0357  | -0.8369 | 0.1838 | 5.31E-06 | ?-?-?+???  | none     |
| rs9975691   | 21  | 14,928,355.00  | G  | T  | 0.6255 | 0.5526  | 0.7611  | -0.2307 | 0.051  | 6.20E-06 | +-----??   | none     |
| rs12084151  | 1   | 238,409,445.00 | G  | A  | 0.9493 | 0.9335  | 0.967   | 0.3896  | 0.0865 | 6.65E-06 | ++++-+---  | none     |
| 5-161442770 | 5   | 161,442,770.00 | T  | C  | 0.0131 | 0.0128  | 0.0148  | -1.3285 | 0.2952 | 6.78E-06 | --?-?????  | none     |
| rs17818859  | 2   | 134,455,240.00 | C  | A  | 0.9858 | 0.9857  | 0.9884  | 2.5604  | 0.569  | 6.80E-06 | ??+?????+? | none     |
| 3-118356759 | 3   | 118,356,759.00 | T  | C  | 0.0355 | 0.013   | 0.0408  | -0.6033 | 0.1346 | 7.43E-06 | ---+---?-- | none     |
| 6-7026945   | 6   | 7,026,945.00   | T  | C  | 0.1035 | 0.0739  | 0.1338  | 0.2961  | 0.0663 | 7.88E-06 | +++++++--+ | none     |
| rs34075049  | 6   | 32,554,935.00  | A  | G  | 0.0522 | 0.0387  | 0.0847  | -0.5887 | 0.1324 | 8.67E-06 | ----?----? | HLA-DRB1 |
| 4-56183854  | 4   | 56,183,854.00  | C  | T  | 0.9619 | 0.9507  | 0.9778  | 0.5671  | 0.128  | 9.45E-06 | +++-+++?++ | none     |

Chr: chromosome number; EA: effect allele; RA: reference allele; Freq: frequency of effect allele; min/maxFreq: the minimum and maximum within cohort allele frequency; Effect: allele effect, in terms of the beta coefficient
