# Supplementary material for: Genome-Wide Association Meta-analysis of Neuropathologic Features of Alzheimer's Disease and Related Dementias
Source: PubMed Central journal article supplement (PMC4154667; doi:10.1371/journal.pgen.1004606), 2014-09-04
Supplement: pgen.1004606.s026.pdf [file pgen.1004606.s026.pdf]

Table S4: Top association signals from the neurofibrillary tangle (NFT) Braak ordinal II phenotype

| Marker      | Chr | Position    | EA | RA | Freq   | minFreq | maxFreq | Effect  | StdErr | Pval     | Direction    | Gene      |
|-------------|-----|-------------|----|----|--------|---------|---------|---------|--------|----------|--------------|-----------|
| rs6857      | 19  | 45,392,254  | T  | C  | 0.3219 | 0.1484  | 0.3904  | 0.7871  | 0.0565 | 4.83E-44 | +++++++?--+  | PVRL2     |
| rs11675119  | 2   | 3,476,422   | A  | C  | 0.2699 | 0.2516  | 0.3825  | -0.2541 | 0.0488 | 1.93E-07 | ---+-----+   | TTC15     |
| 5-161442770 | 5   | 161,442,770 | T  | C  | 0.0131 | 0.0128  | 0.0148  | -1.51   | 0.3137 | 1.48E-06 | --?-???????? | none      |
| 7-102030935 | 7   | 102,030,935 | A  | C  | 0.0178 | 0.0148  | 0.0201  | -4.0337 | 0.8423 | 1.68E-06 | -??-???????? | none      |
| 6-144226924 | 6   | 144,226,924 | A  | G  | 0.0165 | 0.0123  | 0.0214  | -0.9204 | 0.1981 | 3.40E-06 | ----?+-???   | C6orf94   |
| rs10166461  | 2   | 127,859,413 | A  | G  | 0.1733 | 0.1406  | 0.2342  | -0.2636 | 0.057  | 3.82E-06 | +-----+---   | BIN1      |
| 3-118356759 | 3   | 118,356,759 | T  | C  | 0.0358 | 0.0203  | 0.0768  | -0.6753 | 0.1461 | 3.83E-06 | -----?!--    | none      |
| rs34487851  | 2   | 106,642,554 | G  | A  | 0.7314 | 0.6929  | 0.7936  | 0.2523  | 0.055  | 4.46E-06 | +++++++--+?  | none      |
| 17-26640212 | 17  | 26,640,212  | T  | C  | 0.0721 | 0.0432  | 0.1085  | -0.3709 | 0.0809 | 4.59E-06 | ----+---++   | none      |
| rs11654699  | 17  | 30,903,310  | C  | T  | 0.5243 | 0.4735  | 0.6209  | 0.2055  | 0.0449 | 4.63E-06 | +++++++--+   | MYO1D     |
| rs12595161  | 15  | 52,922,890  | A  | G  | 0.0511 | 0.0398  | 0.1158  | -0.4178 | 0.0914 | 4.88E-06 | -----+---    | KIAA1370  |
| rs10209150  | 2   | 182,329,619 | G  | A  | 0.9795 | 0.948   | 0.9848  | 0.591   | 0.1301 | 5.53E-06 | -+++++??-?   | ITGA4     |
| 10-29989988 | 10  | 29,989,988  | T  | C  | 0.0207 | 0.0102  | 0.0287  | -0.7442 | 0.1659 | 7.24E-06 | +-----?+?    | SVIL      |
| rs7339349   | 13  | 74,556,225  | T  | C  | 0.106  | 0.0655  | 0.1139  | 0.3467  | 0.0775 | 7.62E-06 | +++++++?---  | KLF12     |
| rs7626019   | 3   | 42,270,681  | T  | C  | 0.2287 | 0.1478  | 0.2511  | 0.2353  | 0.0526 | 7.63E-06 | +++----+---  | none      |
| 6-25766673  | 6   | 25,766,673  | C  | T  | 0.9842 | 0.9768  | 0.9895  | 0.9418  | 0.2111 | 8.11E-06 | +++++??+??   | SLC17A4   |
| rs11118993  | 1   | 206,715,851 | A  | G  | 0.4787 | 0.426   | 0.5578  | -0.2051 | 0.0461 | 8.52E-06 | -----+---    | RASSF5    |
| rs45576635  | 1   | 201,328,705 | A  | G  | 0.0323 | 0.0323  | 0.0323  | -1.1179 | 0.2513 | 8.64E-06 | ?-?????????? | TNNT2     |
| 15-76085367 | 15  | 76,085,367  | C  | T  | 0.9813 | 0.9732  | 0.9853  | 2.4396  | 0.549  | 8.83E-06 | +??+??+??    | LOC730058 |
| 2-52233271  | 2   | 52,233,271  | C  | T  | 0.9737 | 0.9621  | 0.9821  | 0.9237  | 0.2086 | 9.46E-06 | +++?++?++    | none      |
| rs9431720   | 1   | 232,035,150 | G  | A  | 0.6928 | 0.6621  | 0.7684  | -0.2396 | 0.0541 | 9.57E-06 | -----+---    | DISC1     |
| rs34445340  | 8   | 62,895,791  | C  | A  | 0.5322 | 0.4689  | 0.5755  | 0.1954  | 0.0442 | 9.75E-06 | +++++-----   | none      |
| rs6875253   | 5   | 53,160,978  | T  | G  | 0.4876 | 0.4014  | 0.5841  | -0.2043 | 0.0462 | 9.99E-06 | -----+---    | none      |

Chr: chromosome number; EA: effect allele; RA: reference allele; Freq: frequency of effect allele; min/maxFreq: the minimum and maximum within cohort allele frequency; Effect: allele effect, in terms of the beta coefficient
