# Supplementary material for: Genome-Wide Association Meta-analysis of Neuropathologic Features of Alzheimer's Disease and Related Dementias
Source: PubMed Central journal article supplement (PMC4154667; doi:10.1371/journal.pgen.1004606), 2014-09-04
Supplement: pgen.1004606.s027.pdf [file pgen.1004606.s027.pdf]

Table S5: Top association signals from the neuritic plaque ordinal phenotype

| Marker      | Chr | Position    | EA | RA | Freq   | minFreq | maxFreq | Effect  | StdErr | Pval     | Direction | Gene  |
|-------------|-----|-------------|----|----|--------|---------|---------|---------|--------|----------|-----------|-------|
| rs6857      | 19  | 45,392,254  | T  | C  | 0.3155 | 0.1473  | 0.401   | 0.9467  | 0.0656 | 3.14E-47 | +++++++?  | PVRL2 |
| 17-36075474 | 17  | 36,075,474  | C  | T  | 0.9661 | 0.9602  | 0.9667  | 1.4088  | 0.2906 | 1.25E-06 | ?+????+?  | HNF1B |
| rs34487851  | 2   | 106,642,554 | G  | A  | 0.7349 | 0.6929  | 0.7581  | 0.297   | 0.0616 | 1.42E-06 | +++++++   | none  |
| rs34704559  | 10  | 111,296,290 | G  | T  | 0.8786 | 0.8564  | 0.9073  | 0.435   | 0.0909 | 1.70E-06 | +++++++   | none  |
| rs7294478   | 12  | 7,266,805   | G  | A  | 0.5808 | 0.5352  | 0.6121  | 0.2385  | 0.0499 | 1.73E-06 | +++++++   | none  |
| rs859812    | 8   | 5,593,810   | T  | C  | 0.5045 | 0.4874  | 0.5355  | -0.2351 | 0.0498 | 2.35E-06 | ---+---   | none  |
| rs9406351   | 6   | 32,457,790  | G  | A  | 0.9433 | 0.9167  | 0.9559  | 0.8443  | 0.1812 | 3.16E-06 | ?+??+?    | none  |
| rs62506864  | 8   | 52,300,770  | C  | T  | 0.9691 | 0.9628  | 0.9695  | 1.0201  | 0.2239 | 5.20E-06 | ++?+??+?  | PXDNL |
| rs843451    | 2   | 240,330,994 | G  | A  | 0.742  | 0.7029  | 0.7483  | -0.2849 | 0.0632 | 6.64E-06 | --?--???  | none  |
| rs11805526  | 1   | 239,635,249 | T  | C  | 0.0213 | 0.0172  | 0.0229  | -1.3355 | 0.2969 | 6.84E-06 | ?-?--???  | none  |
| rs9847987   | 3   | 59,418,533  | T  | C  | 0.2012 | 0.1905  | 0.2193  | -0.2696 | 0.0602 | 7.53E-06 | -----     | none  |
| 22-21323101 | 22  | 21,323,101  | A  | C  | 0.3332 | 0.3141  | 0.3494  | -0.4621 | 0.1036 | 8.27E-06 | ?-?+??-?  | AIFM3 |
| 21-43678066 | 21  | 43,678,066  | T  | C  | 0.0108 | 0.0107  | 0.0114  | -1.3434 | 0.3016 | 8.45E-06 | --??????  | ABCG1 |

Chr: chromosome number; EA: effect allele; RA: reference allele; Freq: frequency of effect allele; min/maxFreq: the minimum and maximum within cohort allele frequency; Effect: allele effect, in terms of the beta coefficient
