# Supplementary material for: Genome-Wide Association Meta-analysis of Neuropathologic Features of Alzheimer's Disease and Related Dementias
Source: PubMed Central journal article supplement (PMC4154667; doi:10.1371/journal.pgen.1004606), 2014-09-04
Supplement: pgen.1004606.s028.pdf [file pgen.1004606.s028.pdf]

Table S6: Top association signals from the neuritic plaque case-control phenotype

| Marker      | Chr | Position    | EA | RA | Freq   | minFreq | maxFreq | Effect  | StdErr | Pval     | Direction | Gene    |
|-------------|-----|-------------|----|----|--------|---------|---------|---------|--------|----------|-----------|---------|
| rs6857      | 19  | 45,392,254  | T  | C  | 0.2661 | 0.1473  | 0.3556  | 1.2932  | 0.1191 | 1.78E-27 | +++++?-   | PVRL2   |
| rs62341097  | 4   | 174,094,940 | A  | G  | 0.0458 | 0.0233  | 0.0588  | -1.1474 | 0.1975 | 6.00E-09 | -----+    | GALNT7  |
| 21-43678066 | 21  | 43,678,066  | T  | C  | 0.0108 | 0.0107  | 0.0114  | -2.108  | 0.3658 | 8.00E-09 | --?????   | ABCG1   |
| 9-129356304 | 9   | 129,356,304 | T  | G  | 0.0172 | 0.0108  | 0.0179  | -1.7657 | 0.3224 | 4.30E-08 | ?--?--??  | none    |
| rs17879437  | 19  | 36,642,884  | C  | T  | 0.7681 | 0.7547  | 0.7763  | 0.4789  | 0.0957 | 5.57E-07 | ++?+++?   | COX7A1  |
| 4-65287903  | 4   | 65,287,903  | C  | T  | 0.9882 | 0.9847  | 0.9899  | 1.6678  | 0.3399 | 9.28E-07 | ++??+???  | none    |
| rs9578438   | 13  | 22,729,205  | T  | C  | 0.0393 | 0.0367  | 0.0412  | -1.2374 | 0.2537 | 1.08E-06 | --?-----  | none    |
| 3-72020152  | 3   | 72,020,152  | G  | T  | 0.9743 | 0.9429  | 0.9814  | 0.9748  | 0.2039 | 1.75E-06 | -+---?+   | none    |
| rs28479400  | 15  | 99,995,884  | G  | A  | 0.9494 | 0.9281  | 0.9657  | 0.7864  | 0.1647 | 1.79E-06 | +++----?  | none    |
| rs9938198   | 16  | 20,553,483  | C  | T  | 0.943  | 0.9269  | 0.9596  | 0.7999  | 0.1678 | 1.88E-06 | +++++++   | ACSM2B  |
| rs7294478   | 12  | 7,266,805   | G  | A  | 0.5847 | 0.5352  | 0.6121  | 0.3434  | 0.0728 | 2.42E-06 | +++++++   | none    |
| 6-14334854  | 6   | 14,334,854  | C  | T  | 0.9854 | 0.9759  | 0.989   | 1.5167  | 0.3246 | 2.98E-06 | ++?+++?   | none    |
| rs61041336  | 16  | 58,733,162  | G  | A  | 0.8469 | 0.8326  | 0.8659  | 0.4512  | 0.0966 | 3.04E-06 | +++++++   | none    |
| rs34487851  | 2   | 106,642,554 | G  | A  | 0.7353 | 0.6929  | 0.771   | 0.4143  | 0.0903 | 4.47E-06 | +++++++   | none    |
| rs8037790   | 15  | 92,542,831  | A  | G  | 0.2296 | 0.1981  | 0.258   | -0.4495 | 0.0982 | 4.69E-06 | -----?    | SLCO3A1 |
| 3-140184142 | 3   | 140,184,142 | G  | A  | 0.9509 | 0.9407  | 0.964   | 0.8659  | 0.1908 | 5.67E-06 | +++++++   | CLSTN2  |
| 10-3862933  | 10  | 3,862,933   | T  | C  | 0.128  | 0.1194  | 0.1458  | -0.5928 | 0.1317 | 6.73E-06 | ----?--?  | none    |
| 16-27101370 | 16  | 27,101,370  | A  | C  | 0.0587 | 0.046   | 0.0666  | -0.9141 | 0.2051 | 8.32E-06 | --?---?+  | none    |
| 8-3743232   | 8   | 3,743,232   | C  | A  | 0.9794 | 0.9717  | 0.9869  | 1.0652  | 0.2397 | 8.83E-06 | ++?+?+--  | CSMD1   |
| 8-91474673  | 8   | 91,474,673  | T  | C  | 0.0111 | 0.0111  | 0.0111  | -2.7908 | 0.6293 | 9.23E-06 | ?-??????? | none    |
| 14-23415178 | 14  | 23,415,178  | G  | A  | 0.97   | 0.9644  | 0.9792  | 1.3235  | 0.2987 | 9.41E-06 | ++?+???   | none    |

Chr: chromosome number; EA: effect allele; RA: reference allele; Freq: frequency of effect allele; min/maxFreq: the minimum and maximum within cohort allele frequency; Effect: allele effect, in terms of the beta coefficient
