# Supplementary material for: Genome-Wide Association Meta-analysis of Neuropathologic Features of Alzheimer's Disease and Related Dementias
Source: PubMed Central journal article supplement (PMC4154667; doi:10.1371/journal.pgen.1004606), 2014-09-04
Supplement: pgen.1004606.s029.pdf [file pgen.1004606.s029.pdf]

Table S7: Top association signals from the Lewy body disease (LBD) ordinal I phenotype

| Marker      | Chr | Position    | EA | RA | Freq   | minFreq | maxFreq | Effect  | StdErr | Pval     | Direction | Gene              |
|-------------|-----|-------------|----|----|--------|---------|---------|---------|--------|----------|-----------|-------------------|
| rs429358    | 19  | 45,411,941  | C  | T  | 0.732  | 0.6482  | 0.8712  | -0.4997 | 0.0702 | 1.10E-12 | -----     | APOE,LOC100129500 |
| 4-185405621 | 4   | 185,405,621 | A  | G  | 0.0524 | 0.0355  | 0.0613  | 0.528   | 0.1106 | 1.82E-06 | ++++++    | none              |
| rs1570582   | 9   | 85,910,512  | C  | A  | 0.9471 | 0.9259  | 0.9691  | -0.5137 | 0.1082 | 2.07E-06 | -----     | FRMD3             |
| 12-85076811 | 12  | 85,076,811  | C  | A  | 0.966  | 0.9613  | 0.9874  | -0.7577 | 0.1614 | 2.66E-06 | ---+--    | none              |
| 1-228841770 | 1   | 228,841,770 | A  | C  | 0.1068 | 0.0863  | 0.1234  | 0.3993  | 0.0851 | 2.71E-06 | ++++++    | none              |
| rs12590995  | 14  | 44,682,864  | C  | A  | 0.9191 | 0.9131  | 0.9527  | -0.4494 | 0.0962 | 3.02E-06 | -----+    | none              |
| rs6127813   | 20  | 55,255,054  | T  | C  | 0.2983 | 0.2515  | 0.3032  | -0.2697 | 0.0581 | 3.42E-06 | -----     | none              |
| rs2124379   | 11  | 18,297,563  | T  | C  | 0.423  | 0.4075  | 0.4253  | -0.2774 | 0.0598 | 3.49E-06 | -----     | none              |
| rs55770291  | 11  | 76,922,581  | A  | G  | 0.0114 | 0.0109  | 0.0163  | 1.6201  | 0.3527 | 4.37E-06 | +++???    | MYO7A             |
| rs262741    | 5   | 165,132,974 | G  | A  | 0.5416 | 0.5355  | 0.5926  | 0.2447  | 0.0537 | 5.30E-06 | ?+++++    | none              |
| 1-155733245 | 1   | 155,733,245 | T  | C  | 0.0602 | 0.0559  | 0.0833  | 0.7777  | 0.1711 | 5.48E-06 | ?++?+-    | GON4L             |
| rs28523990  | 7   | 124,436,139 | T  | C  | 0.282  | 0.2637  | 0.3198  | -0.2719 | 0.0606 | 7.28E-06 | -----+    | none              |
| rs133911    | 22  | 44,523,162  | G  | A  | 0.7038 | 0.696   | 0.7091  | -0.3047 | 0.068  | 7.44E-06 | ---??-    | PARVB             |
| rs2452591   | 4   | 95,476,719  | A  | C  | 0.3832 | 0.3103  | 0.4043  | -0.2693 | 0.0603 | 7.94E-06 | -----     | PDLIM5            |
| rs7078209   | 10  | 124,860,026 | G  | T  | 0.6751 | 0.646   | 0.7021  | 0.2658  | 0.0596 | 8.30E-06 | ++++++    | none              |
| rs2584363   | 8   | 108,158,383 | T  | C  | 0.1921 | 0.1682  | 0.2212  | -0.3098 | 0.0696 | 8.45E-06 | +-----    | none              |
| rs6887317   | 5   | 11,371,047  | A  | G  | 0.407  | 0.3885  | 0.4576  | 0.2466  | 0.0554 | 8.61E-06 | ?+++++    | CTNND2            |
| rs11148252  | 13  | 53,009,048  | C  | T  | 0.5913 | 0.5461  | 0.6042  | -0.2351 | 0.0529 | 8.77E-06 | +-----    | VPS36             |
| rs913351    | 9   | 130,033,547 | G  | A  | 0.9798 | 0.9775  | 0.9868  | -0.811  | 0.1825 | 8.84E-06 | ---+--    | GARNL3            |
| 15-52443375 | 15  | 52,443,375  | A  | G  | 0.0103 | 0.0102  | 0.0123  | 2.0434  | 0.4612 | 9.39E-06 | ?+??+?    | GNB5              |
| rs11618716  | 13  | 53,046,836  | C  | T  | 0.5858 | 0.5478  | 0.5991  | -0.2399 | 0.0542 | 9.67E-06 | +-----    | CKAP2             |

Chr: chromosome number; EA: effect allele; RA: reference allele; Freq: frequency of effect allele; min/maxFreq: the minimum and maximum within cohort allele frequency; Effect: allele effect, in terms of the beta coefficient
