# Supplementary material for: Genome-Wide Association Meta-analysis of Neuropathologic Features of Alzheimer's Disease and Related Dementias
Source: PubMed Central journal article supplement (PMC4154667; doi:10.1371/journal.pgen.1004606), 2014-09-04
Supplement: pgen.1004606.s030.pdf [file pgen.1004606.s030.pdf]

Table S8: Top association signals from the Lewy body disease (LBD) case-control phenotype

| Marker      | Chr | Position    | EA | RA | Freq   | minFreq | maxFreq | Effect  | StdErr | Pval     | Direction | Gene              |
|-------------|-----|-------------|----|----|--------|---------|---------|---------|--------|----------|-----------|-------------------|
| rs429358    | 19  | 45,411,941  | C  | T  | 0.7344 | 0.6482  | 0.8712  | -0.4905 | 0.0737 | 2.83E-11 | -----     | APOE,LOC100129500 |
| 4-185384861 | 4   | 185,384,861 | G  | A  | 0.9531 | 0.9439  | 0.966   | -0.659  | 0.1343 | 9.32E-07 | -----+    | IRF2              |
| rs6127813   | 20  | 55,255,054  | T  | C  | 0.2984 | 0.2529  | 0.3032  | -0.282  | 0.0597 | 2.31E-06 | -----     | none              |
| rs7078209   | 10  | 124,860,026 | G  | T  | 0.6744 | 0.6409  | 0.7021  | 0.2812  | 0.0611 | 4.10E-06 | +++++     | none              |
| rs727505    | 7   | 124,462,081 | A  | G  | 0.2876 | 0.2689  | 0.3287  | -0.2807 | 0.0613 | 4.62E-06 | -----     | none              |
| rs2803904   | 14  | 38,641,706  | C  | T  | 0.5791 | 0.5434  | 0.5935  | 0.2574  | 0.0563 | 4.90E-06 | +++++     | none              |
| rs11024598  | 11  | 18,291,736  | G  | A  | 0.4743 | 0.4644  | 0.5181  | 0.262   | 0.0585 | 7.60E-06 | +++++     | none              |
| 2-228891013 | 2   | 228,891,013 | G  | A  | 0.9785 | 0.97    | 0.9867  | -1.1951 | 0.268  | 8.22E-06 | ----?-    | SPHKAP            |
| rs7132746   | 12  | 86,259,458  | C  | T  | 0.8751 | 0.8519  | 0.9059  | -0.3439 | 0.0775 | 9.15E-06 | ---++     | none              |

Chr: chromosome number; EA: effect allele; RA: reference allele; Freq: frequency of effect allele; min/maxFreq: the minimum and maximum within cohort allele frequency; Effect: allele effect, in terms of the beta coefficient
