# Supplementary material for: Genome-Wide Association Meta-analysis of Neuropathologic Features of Alzheimer's Disease and Related Dementias
Source: PubMed Central journal article supplement (PMC4154667; doi:10.1371/journal.pgen.1004606), 2014-09-04
Supplement: pgen.1004606.s032.pdf [file pgen.1004606.s032.pdf]

Table S10: Top association signals from the vascular brain injury (VBI) case-control phenotype

| Marker       | Chr | Position    | EA | RA | Freq   | minFreq | maxFreq | Effect  | StdErr | Pval     | Direction | Gene     |
|--------------|-----|-------------|----|----|--------|---------|---------|---------|--------|----------|-----------|----------|
| rs11769293   | 7   | 28,911,807  | T  | C  | 0.0291 | 0.0233  | 0.0398  | 1.0518  | 0.2179 | 1.38E-06 | ++++?     | none     |
| rs11144781   | 9   | 78,793,421  | T  | G  | 0.0316 | 0.0228  | 0.038   | 0.8393  | 0.1793 | 2.87E-06 | +++++     | PCSK5    |
| 10-106180121 | 10  | 106,180,121 | G  | T  | 0.9892 | 0.9856  | 0.9895  | -2.5402 | 0.5447 | 3.11E-06 | --+??     | CCDC147  |
| rs34660913   | 11  | 13,158,010  | T  | C  | 0.0931 | 0.0784  | 0.1065  | -0.6319 | 0.1355 | 3.13E-06 | ---?-     | none     |
| rs7596264    | 2   | 144,168,635 | G  | A  | 0.8696 | 0.865   | 0.9259  | 0.4449  | 0.0978 | 5.40E-06 | ++++-     | ARHGAP15 |
| rs9685722    | 4   | 16,407,135  | T  | C  | 0.1213 | 0.0722  | 0.1388  | -0.4804 | 0.1059 | 5.75E-06 | ----+     | none     |
| rs6041428    | 20  | 12,506,345  | G  | A  | 0.9842 | 0.9737  | 0.987   | -1.256  | 0.2777 | 6.12E-06 | +--??     | none     |
| rs7048146    | 9   | 112,299,322 | T  | C  | 0.3898 | 0.3602  | 0.4477  | -0.2753 | 0.061  | 6.31E-06 | -----     | none     |
| 3-66952276   | 3   | 66,952,276  | C  | T  | 0.9842 | 0.9839  | 0.9873  | -1.2693 | 0.2842 | 7.93E-06 | +--??     | none     |
| rs11602337   | 11  | 25,113,781  | T  | C  | 0.2923 | 0.2764  | 0.3059  | -0.2943 | 0.066  | 8.20E-06 | -----     | none     |
| rs62174474   | 2   | 188,180,409 | C  | T  | 0.9439 | 0.9027  | 0.9499  | -0.7084 | 0.159  | 8.35E-06 | ---?-     | none     |
| 7-134674232  | 7   | 134,674,232 | A  | G  | 0.0219 | 0.0201  | 0.068   | 1.0975  | 0.2466 | 8.56E-06 | ?+??+     | AGBL3    |
| rs7000623    | 8   | 5,741,723   | A  | C  | 0.4026 | 0.3805  | 0.4445  | -0.2921 | 0.0661 | 9.88E-06 | --+--     | none     |

Chr: chromosome number; EA: effect allele; RA: reference allele; Freq: frequency of effect allele; min/maxFreq: the minimum and maximum within cohort allele frequency; Effect: allele effect, in terms of the beta coefficient
