# Supplementary material for: Genome-Wide Association Meta-analysis of Neuropathologic Features of Alzheimer's Disease and Related Dementias
Source: PubMed Central journal article supplement (PMC4154667; doi:10.1371/journal.pgen.1004606), 2014-09-04
Supplement: pgen.1004606.s033.pdf [file pgen.1004606.s033.pdf]

Table S11: Top association signals from the vascular brain injury (VBI) ordinal phenotype

| Marker       | Chr | Position    | EA | RA | Freq   | minFreq | maxFreq | Effect  | StdErr | Pval     | Direction | Gene     |
|--------------|-----|-------------|----|----|--------|---------|---------|---------|--------|----------|-----------|----------|
| rs7048146    | 9   | 112,299,322 | T  | C  | 0.3891 | 0.3602  | 0.4596  | -0.2933 | 0.0588 | 6.10E-07 | -----     | none     |
| rs11144781   | 9   | 78,793,421  | T  | G  | 0.0318 | 0.0228  | 0.0434  | 0.7998  | 0.167  | 1.67E-06 | +++++     | PCSK5    |
| 3-66952276   | 3   | 66,952,276  | C  | T  | 0.9841 | 0.9839  | 0.9873  | -1.2736 | 0.266  | 1.69E-06 | +?-??     | none     |
| 10-106180121 | 10  | 106,180,121 | G  | T  | 0.9893 | 0.9856  | 0.9895  | -2.0531 | 0.4378 | 2.74E-06 | --+??     | CCDC147  |
| rs34660913   | 11  | 13,158,010  | T  | C  | 0.0922 | 0.0666  | 0.1065  | -0.6007 | 0.1319 | 5.24E-06 | --+?-     | none     |
| 7-134674232  | 7   | 134,674,232 | A  | G  | 0.0219 | 0.0201  | 0.0785  | 1.0385  | 0.2295 | 6.02E-06 | ?+??+?    | AGBL3    |
| rs2018293    | 22  | 26,704,561  | T  | C  | 0.185  | 0.1538  | 0.2401  | 0.3091  | 0.0692 | 8.01E-06 | ++++-     | SEZ6L    |
| rs11769293   | 7   | 28,911,807  | T  | C  | 0.0289 | 0.0233  | 0.0398  | 0.9011  | 0.202  | 8.18E-06 | ++++?     | none     |
| 8-80222312   | 8   | 80,222,312  | T  | C  | 0.1612 | 0.1163  | 0.1887  | -0.3494 | 0.0787 | 9.00E-06 | -----     | none     |
| rs13331544   | 16  | 25,779,378  | G  | A  | 0.5781 | 0.4655  | 0.6283  | 0.2622  | 0.0592 | 9.60E-06 | +++++     | none     |
| 3-108271501  | 3   | 108,271,501 | T  | C  | 0.0129 | 0.0127  | 0.0265  | 1.2639  | 0.2858 | 9.78E-06 | ++??+?    | KIAA1524 |

Chr: chromosome number; EA: effect allele; RA: reference allele; Freq: frequency of effect allele; min/maxFreq: the minimum and maximum within cohort allele frequency; Effect: allele effect, in terms of the beta coefficient
