# Supplementary material for: Genome-Wide Association Meta-analysis of Neuropathologic Features of Alzheimer's Disease and Related Dementias
Source: PubMed Central journal article supplement (PMC4154667; doi:10.1371/journal.pgen.1004606), 2014-09-04
Supplement: pgen.1004606.s034.pdf [file pgen.1004606.s034.pdf]

Table S12: Top association signals from the hippocampal sclerosis (HS) case-control phenotype

| Marker       | Chr | Position    | EA | RA | Freq   | minFreq | maxFreq | Effect  | StdErr | Pval     | Direction | Gene    |
|--------------|-----|-------------|----|----|--------|---------|---------|---------|--------|----------|-----------|---------|
| 18-6434981   | 18  | 6,434,981   | A  | C  | 0.0104 | 0.0104  | 0.0104  | 2.5601  | 0.4684 | 4.60E-08 | ?+??      | none    |
| rs9637454    | 3   | 178,257,562 | A  | G  | 0.2791 | 0.27    | 0.2819  | 0.5006  | 0.0929 | 7.10E-08 | ++++      | KCNMB2  |
| rs34132583   | 4   | 146,360,757 | A  | G  | 0.0416 | 0.0329  | 0.0512  | 0.9231  | 0.1793 | 2.64E-07 | +++-      | none    |
| 3-16865013   | 3   | 16,865,013  | T  | G  | 0.0165 | 0.0126  | 0.0245  | 1.3092  | 0.2653 | 8.01E-07 | ?++-      | none    |
| rs4589573    | 16  | 30,268,781  | T  | C  | 0.0152 | 0.0122  | 0.0154  | 2.023   | 0.4141 | 1.03E-06 | ++?-      | none    |
| rs8074980    | 17  | 56,010,960  | A  | G  | 0.1716 | 0.1538  | 0.1937  | 0.5238  | 0.1077 | 1.14E-06 | +++-      | none    |
| rs11241261   | 5   | 113,395,481 | T  | C  | 0.1491 | 0.1326  | 0.1553  | 0.5443  | 0.1135 | 1.64E-06 | ++++      | none    |
| rs3007243    | 13  | 105,806,954 | G  | A  | 0.959  | 0.9425  | 0.9683  | -0.8386 | 0.1752 | 1.69E-06 | ----      | none    |
| rs12950363   | 17  | 35,015,902  | T  | G  | 0.0749 | 0.0704  | 0.0767  | 0.9201  | 0.1931 | 1.89E-06 | ?+++      | none    |
| 11-20955053  | 11  | 20,955,053  | G  | A  | 0.9555 | 0.9451  | 0.9593  | -0.8951 | 0.1898 | 2.40E-06 | ---?      | NELL1   |
| 20-38725000  | 20  | 38,725,000  | C  | T  | 0.9818 | 0.977   | 0.9832  | -1.7275 | 0.3666 | 2.45E-06 | ---?      | none    |
| rs28671666   | 7   | 12,184,430  | A  | G  | 0.2128 | 0.1779  | 0.2244  | 0.5396  | 0.1157 | 3.09E-06 | ++++      | none    |
| 6-149652735  | 6   | 149,652,735 | T  | C  | 0.0109 | 0.0108  | 0.0116  | 1.7356  | 0.373  | 3.27E-06 | ?++?      | none    |
| rs10906824   | 10  | 15,128,969  | A  | G  | 0.033  | 0.0244  | 0.0383  | 0.9719  | 0.2095 | 3.50E-06 | +++-      | ACBD7   |
| 16-59161124  | 16  | 59,161,124  | G  | A  | 0.9704 | 0.9696  | 0.9821  | -1.0064 | 0.218  | 3.91E-06 | ----      | none    |
| rs12316703   | 12  | 118,840,457 | G  | A  | 0.9171 | 0.9099  | 0.9201  | -0.6574 | 0.1427 | 4.09E-06 | ----      | SUDS3   |
| 3-192820385  | 3   | 192,820,385 | A  | G  | 0.0177 | 0.0168  | 0.0182  | 1.5944  | 0.3466 | 4.22E-06 | ++++      | none    |
| 2-62486295   | 2   | 62,486,295  | C  | T  | 0.8097 | 0.7916  | 0.8479  | -0.585  | 0.1274 | 4.39E-06 | ---+      | none    |
| 3-145097436  | 3   | 145,097,436 | A  | G  | 0.0411 | 0.0363  | 0.0425  | 1.1395  | 0.2486 | 4.59E-06 | ?++?      | none    |
| rs12498806   | 4   | 127,363,097 | C  | T  | 0.9832 | 0.9813  | 0.9835  | -1.2967 | 0.2836 | 4.81E-06 | --??      | none    |
| 16-20899251  | 16  | 20,899,251  | C  | T  | 0.9721 | 0.9618  | 0.9796  | -1.2586 | 0.2757 | 4.98E-06 | ----      | DCUN1D3 |
| 11-126602487 | 11  | 126,602,487 | G  | A  | 0.9828 | 0.9822  | 0.9875  | -1.6129 | 0.3589 | 6.97E-06 | ?-+-      | KIRREL3 |
| rs7235840    | 18  | 73,725,200  | T  | C  | 0.1476 | 0.1303  | 0.16    | 0.5571  | 0.124  | 7.06E-06 | ++++      | none    |
| 8-288884     | 8   | 288,884     | A  | G  | 0.0406 | 0.0279  | 0.046   | 0.9309  | 0.208  | 7.64E-06 | +++-      | none    |
| rs62277617   | 4   | 7,459,875   | G  | A  | 0.9132 | 0.9022  | 0.9507  | -0.7386 | 0.1651 | 7.72E-06 | ----      | SORCS2  |
| 12-127979137 | 12  | 127,979,137 | T  | C  | 0.0146 | 0.013   | 0.0151  | 1.635   | 0.3656 | 7.75E-06 | ?+++      | none    |
| 16-82453134  | 16  | 82,453,134  | T  | C  | 0.0179 | 0.0147  | 0.0213  | 1.4961  | 0.3354 | 8.20E-06 | ++++      | none    |
| 3-130938261  | 3   | 130,938,261 | T  | C  | 0.0219 | 0.0213  | 0.0241  | 1.3424  | 0.3014 | 8.42E-06 | ?++-      | NEK11   |
| 12-3184006   | 12  | 3,184,006   | T  | C  | 0.0383 | 0.0292  | 0.0466  | 1.0377  | 0.2335 | 8.87E-06 | ?+++      | none    |
| 6-147224959  | 6   | 147,224,959 | T  | C  | 0.0125 | 0.0125  | 0.0143  | 2.1229  | 0.4794 | 9.51E-06 | -+??      | none    |
| 8-63185819   | 8   | 63,185,819  | A  | C  | 0.0262 | 0.0119  | 0.0321  | 1.2774  | 0.2888 | 9.72E-06 | ++++      | NKAIN3  |
| rs5992977    | 22  | 18,530,144  | T  | C  | 0.0195 | 0.0185  | 0.0257  | 1.2384  | 0.2803 | 9.99E-06 | ++++      | none    |

Chr: chromosome number; EA: effect allele; RA: reference allele; Freq: frequency of effect allele; min/maxFreq: the minimum and maximum within cohort allele frequency; Effect: allele effect, in terms of the beta coefficient
