# Supplementary material for: Genome-Wide Association Meta-analysis of Neuropathologic Features of Alzheimer's Disease and Related Dementias
Source: PubMed Central journal article supplement (PMC4154667; doi:10.1371/journal.pgen.1004606), 2014-09-04
Supplement: pgen.1004606.s035.pdf [file pgen.1004606.s035.pdf]

Table S13: Top association signals from the cerebral amyloid angiopathy (CAA) case-control phenotype

| Marker     | Chr | Position    | EA | RA | Freq   | minFreq | maxFreq | Effect  | StdErr | Pval     | Direction | Gene  |
|------------|-----|-------------|----|----|--------|---------|---------|---------|--------|----------|-----------|-------|
| rs6857     | 19  | 45,392,254  | T  | C  | 0.3429 | 0.1511  | 0.3997  | 0.6708  | 0.0709 | 2.92E-21 | ++++?+    | PVRL2 |
| rs16989979 | 4   | 34,545,346  | T  | G  | 0.2408 | 0.2166  | 0.2766  | -0.3325 | 0.0697 | 1.82E-06 | ---++     | none  |
| rs17014760 | 4   | 130,340,880 | A  | G  | 0.2465 | 0.1702  | 0.2748  | 0.3262  | 0.0724 | 6.64E-06 | +++++-    | none  |
| rs1116547  | 5   | 112,680,337 | T  | C  | 0.1269 | 0.0649  | 0.1594  | -0.396  | 0.088  | 6.82E-06 | ---+-     | MCC   |
| rs11075138 | 16  | 12,723,811  | G  | A  | 0.9067 | 0.9019  | 0.9589  | -0.5115 | 0.1145 | 7.95E-06 | -----     | none  |
| rs7817714  | 8   | 103,048,810 | C  | T  | 0.859  | 0.848   | 0.8901  | -0.4448 | 0.0999 | 8.52E-06 | --?---    | NCALD |
| 7-18698331 | 7   | 18,698,331  | G  | T  | 0.9733 | 0.9664  | 0.9775  | -1.1568 | 0.2606 | 9.06E-06 | --?--?    | HDAC9 |
| rs6921741  | 6   | 21,864,168  | A  | C  | 0.1491 | 0.0517  | 0.1763  | 0.4047  | 0.0916 | 9.91E-06 | +++++-    | none  |

Chr: chromosome number; EA: effect allele; RA: reference allele; Freq: frequency of effect allele; min/maxFreq: the minimum and maximum within cohort allele frequency; Effect: allele effect, in terms of the beta coefficient
