# Supplementary material for: Genome-Wide Association Meta-analysis of Neuropathologic Features of Alzheimer's Disease and Related Dementias
Source: PubMed Central journal article supplement (PMC4154667; doi:10.1371/journal.pgen.1004606), 2014-09-04
Supplement: pgen.1004606.s037.pdf [file pgen.1004606.s037.pdf]

Table S15: Association of common AD risk variants with coincident neuropathologic features

| Type    | SNP        | GENE       | CHR | POS         | Major/Minor | IGAP Paper (CC) |      |         | Lewy Body (Ordinal-I) |      |                 | Le    |
|---------|------------|------------|-----|-------------|-------------|-----------------|------|---------|-----------------------|------|-----------------|-------|
|         |            |            |     |             |             | MAF             | OR   | p-value | MAF                   | OR   | p-value         | MAF   |
| Known   | rs6656401  | CR1        | 1   | 207,692,049 | G/A         | 0.197           | 1.18 | 5.7E-24 | 0.204                 | 0.98 | 8.00E-01        | 0.203 |
| Known   | rs6733839  | BIN1       | 2   | 127,892,810 | C/T         | 0.409           | 1.22 | 6.9E-44 | 0.441                 | 1.09 | 1.20E-01        | 0.441 |
| Known   | rs10948363 | CD2AP      | 6   | 47,487,762  | A/G         | 0.266           | 1.10 | 5.2E-11 | 0.276                 | 1.00 | 9.90E-01        | 0.275 |
| Known   | rs11771145 | EPHA1      | 7   | 143,110,762 | G/A         | 0.338           | 0.90 | 1.1E-13 | 0.334                 | 1.05 | 3.90E-01        | 0.334 |
| Known   | rs9331896  | CLU        | 8   | 27,467,686  | T/C         | 0.379           | 0.86 | 2.8E-25 | 0.372                 | 0.94 | 2.50E-01        | 0.372 |
| Known   | rs983392   | MS4A6A     | 11  | 59,923,508  | A/G         | 0.403           | 0.90 | 6.1E-16 | 0.390                 | 1.01 | 8.70E-01        | 0.390 |
| Known   | rs10792832 | PICALM     | 11  | 85,867,875  | G/A         | 0.358           | 0.87 | 9.3E-26 | 0.348                 | 1.01 | 7.90E-01        | 0.348 |
| Known   | rs4147929  | ABCA7      | 19  | 1,063,443   | G/A         | 0.190           | 1.15 | 1.1E-15 | 0.187                 | 0.98 | 8.00E-01        | 0.186 |
| Known   | rs3865444  | CD33       | 19  | 51,727,962  | C/A         | 0.307           | 0.94 | 3.0E-06 | 0.301                 | 1.01 | 9.10E-01        | 0.301 |
| New D   | rs9271192  | -DRB5/HLA- | 6   | 32,578,530  | A/C         | 0.276           | 1.11 | 2.9E-12 | 0.283                 | 1.05 | 3.90E-01        | 0.282 |
| New D   | rs2883497C | PTK2B      | 8   | 27,195,121  | T/C         | 0.366           | 1.10 | 7.4E-14 | 0.364                 | 0.98 | 7.40E-01        | 0.364 |
| New D   | rs11218343 | SORL1      | 11  | 121,435,587 | T/C         | 0.039           | 0.77 | 9.7E-15 | 0.036                 | 1.31 | <b>4.90E-02</b> | 0.036 |
| New D   | rs10498633 | LC24A4/RIN | 14  | 92,926,952  | G/T         | 0.217           | 0.91 | 5.5E-09 | 0.211                 | 0.98 | 7.50E-01        | 0.211 |
| New D   | rs8093731  | DSG2       | 18  | 29,088,958  | C/T         | 0.017           | 0.73 | 1.0E-04 | 0.011                 | 0.85 | 6.10E-01        | 0.011 |
| New D&R | rs35349669 | INPP5D     | 2   | 234,068,476 | C/T         | 0.488           | 1.08 | 3.2E-08 | 0.505                 | 1.03 | 5.70E-01        | 0.505 |
| New D&R | rs190982   | MEF2C      | 5   | 88,223,420  | A/G         | 0.408           | 0.93 | 3.2E-08 | 0.417                 | 0.90 | 6.40E-02        | 0.417 |
| New D&R | rs2718058  | NME8       | 7   | 37,841,534  | A/G         | 0.373           | 0.93 | 4.8E-09 | 0.352                 | 1.01 | 9.20E-01        | 0.352 |
| New D&R | rs1476679  | ZCWPW1     | 7   | 100,004,446 | T/C         | 0.287           | 0.91 | 5.6E-10 | 0.277                 | 1.03 | 5.90E-01        | 0.278 |
| New D&R | rs10838725 | CELF1      | 11  | 47,557,871  | T/C         | 0.316           | 1.08 | 1.1E-08 | 0.318                 | 1.00 | 9.80E-01        | 0.317 |
| New D&R | rs17125944 | FERMT2     | 14  | 53,400,629  | T/C         | 0.092           | 1.14 | 7.9E-09 | 0.094                 | 1.05 | 6.10E-01        | 0.094 |
| New D&R | rs7274581  | CASS4      | 20  | 55,018,260  | T/C         | 0.083           | 0.88 | 2.5E-08 | 0.074                 | 1.05 | 6.40E-01        | 0.074 |

Bold text indicates p-values meeting an alpha=0.05 threshold, uncorrected for multiple testing

| <u>Lewy Body (CC)</u> |                 | <u>Lewy Body (Ordinal-II)</u> |      |                 | <u>Vascular Brain Injury (CC)</u> |      |          | <u>Vascular Brain Injury (Ordinal)</u> |      |                 | <u>Medial Temporal Scler</u> |      |
|-----------------------|-----------------|-------------------------------|------|-----------------|-----------------------------------|------|----------|----------------------------------------|------|-----------------|------------------------------|------|
| OR                    | p-value         | MAF                           | OR   | p-value         | MAF                               | OR   | p-value  | MAF                                    | OR   | p-value         | MAF                          | OR   |
| 0.99                  | 8.60E-01        | 0.203                         | 0.99 | 8.40E-01        | 0.217                             | 1.00 | 9.80E-01 | 0.217                                  | 0.99 | 8.90E-01        | 0.212                        | 1.18 |
| 1.08                  | 1.70E-01        | 0.441                         | 1.10 | 1.10E-01        | 0.441                             | 0.89 | 5.60E-02 | 0.441                                  | 0.91 | 1.50E-01        | 0.439                        | 1.08 |
| 1.00                  | 1.00E+00        | 0.276                         | 0.99 | 9.00E-01        | 0.282                             | 1.03 | 6.20E-01 | 0.282                                  | 1.05 | 4.30E-01        | 0.276                        | 0.96 |
| 1.04                  | 4.90E-01        | 0.334                         | 1.04 | 5.10E-01        | 0.337                             | 0.93 | 2.10E-01 | 0.337                                  | 0.91 | 1.20E-01        | 0.337                        | 1.09 |
| 0.93                  | 1.90E-01        | 0.372                         | 0.92 | 1.60E-01        | 0.375                             | 1.03 | 6.10E-01 | 0.375                                  | 1.03 | 6.00E-01        | 0.379                        | 0.99 |
| 1.01                  | 8.80E-01        | 0.390                         | 1.01 | 8.30E-01        | 0.390                             | 1.06 | 3.30E-01 | 0.390                                  | 1.06 | 3.10E-01        | 0.394                        | 0.95 |
| 1.01                  | 9.00E-01        | 0.348                         | 1.01 | 9.20E-01        | 0.348                             | 0.94 | 3.10E-01 | 0.347                                  | 0.97 | 5.50E-01        | 0.350                        | 1.16 |
| 0.99                  | 9.20E-01        | 0.186                         | 1.00 | 9.80E-01        | 0.182                             | 1.10 | 2.00E-01 | 0.182                                  | 1.08 | 3.10E-01        | 0.190                        | 0.99 |
| 0.99                  | 8.70E-01        | 0.301                         | 1.00 | 9.50E-01        | 0.306                             | 0.93 | 2.20E-01 | 0.306                                  | 0.95 | 3.90E-01        | 0.300                        | 0.97 |
| 1.05                  | 4.10E-01        | 0.283                         | 1.05 | 4.00E-01        | 0.282                             | 0.96 | 4.90E-01 | 0.283                                  | 0.96 | 5.10E-01        | 0.282                        | 1.04 |
| 1.00                  | 9.60E-01        | 0.364                         | 0.99 | 8.80E-01        | 0.366                             | 0.96 | 5.50E-01 | 0.367                                  | 0.95 | 4.20E-01        | 0.362                        | 0.78 |
| 1.31                  | 5.10E-02        | 0.036                         | 1.32 | <b>5.00E-02</b> | 0.035                             | 1.14 | 4.10E-01 | 0.035                                  | 1.13 | 4.30E-01        | 0.036                        | 0.93 |
| 0.98                  | 7.80E-01        | 0.211                         | 0.97 | 6.20E-01        | 0.209                             | 1.06 | 4.30E-01 | 0.211                                  | 1.08 | 2.60E-01        | 0.211                        | 1.08 |
| 0.95                  | 8.80E-01        | 0.011                         | 0.94 | 8.40E-01        | 0.013                             | 1.41 | 6.80E-01 | 0.015                                  | 1.09 | 8.90E-01        | 0.012                        | 0.89 |
| 1.05                  | 4.00E-01        | 0.505                         | 1.04 | 5.10E-01        | 0.504                             | 0.90 | 8.00E-02 | 0.502                                  | 0.93 | 2.00E-01        | 0.501                        | 0.87 |
| 0.88                  | <b>2.20E-02</b> | 0.417                         | 0.88 | <b>2.70E-02</b> | 0.420                             | 1.00 | 9.70E-01 | 0.420                                  | 0.98 | 7.80E-01        | 0.420                        | 1.06 |
| 1.01                  | 8.80E-01        | 0.352                         | 1.01 | 7.90E-01        | 0.357                             | 1.12 | 5.60E-02 | 0.356                                  | 1.12 | <b>4.90E-02</b> | 0.349                        | 1.10 |
| 1.05                  | 4.30E-01        | 0.278                         | 1.04 | 5.30E-01        | 0.275                             | 1.00 | 9.50E-01 | 0.275                                  | 0.99 | 8.20E-01        | 0.274                        | 0.94 |
| 0.98                  | 7.20E-01        | 0.317                         | 0.97 | 6.30E-01        | 0.321                             | 1.06 | 3.80E-01 | 0.320                                  | 1.05 | 4.50E-01        | 0.319                        | 0.84 |
| 1.06                  | 5.40E-01        | 0.094                         | 1.07 | 4.90E-01        | 0.099                             | 0.89 | 2.40E-01 | 0.099                                  | 0.91 | 3.40E-01        | 0.093                        | 1.12 |
| 1.04                  | 6.90E-01        | 0.074                         | 1.03 | 8.00E-01        | 0.077                             | 1.13 | 2.80E-01 | 0.078                                  | 1.06 | 5.70E-01        | 0.078                        | 1.12 |

| <u>Leukocytosis (CC)</u> | <u>Amyloid Angiopathy (CC)</u> |           |                |
|--------------------------|--------------------------------|-----------|----------------|
| <u>p-value</u>           | <u>MAF</u>                     | <u>OR</u> | <u>p-value</u> |
| 1.10E-01                 | 0.210                          | 1.03      | 6.70E-01       |
| 4.30E-01                 | 0.444                          | 1.02      | 7.10E-01       |
| 6.90E-01                 | 0.283                          | 0.98      | 8.10E-01       |
| 3.80E-01                 | 0.333                          | 1.07      | 2.70E-01       |
| 8.90E-01                 | 0.376                          | 0.94      | 3.80E-01       |
| 5.90E-01                 | 0.389                          | 0.97      | 6.50E-01       |
| 1.00E-01                 | 0.349                          | 0.96      | 4.70E-01       |
| 9.50E-01                 | 0.186                          | 1.06      | 4.70E-01       |
| 7.60E-01                 | 0.305                          | 0.94      | 3.10E-01       |
| 7.20E-01                 | 0.279                          | 0.97      | 7.20E-01       |
| <b>9.40E-03</b>          | 0.362                          | 0.90      | 1.10E-01       |
| 7.80E-01                 | 0.036                          | 0.98      | 8.90E-01       |
| 4.60E-01                 | 0.210                          | 1.00      | 9.60E-01       |
| 8.00E-01                 | 0.011                          | 0.82      | 5.40E-01       |
| 1.40E-01                 | 0.504                          | 0.97      | 6.70E-01       |
| 5.60E-01                 | 0.424                          | 0.98      | 8.00E-01       |
| 2.80E-01                 | 0.347                          | 1.04      | 5.30E-01       |
| 5.60E-01                 | 0.278                          | 1.07      | 3.10E-01       |
| 6.70E-02                 | 0.323                          | 0.94      | 3.50E-01       |
| 4.50E-01                 | 0.097                          | 0.91      | 3.60E-01       |
| 4.70E-01                 | 0.077                          | 1.07      | 5.70E-01       |
