# Supplementary material for: Genome-Wide Association Meta-analysis of Neuropathologic Features of Alzheimer's Disease and Related Dementias
Source: PubMed Central journal article supplement (PMC4154667; doi:10.1371/journal.pgen.1004606), 2014-09-04
Supplement: pgen.1004606.s038.pdf [file pgen.1004606.s038.pdf]

**Table S16: Cohort contact information**

| Cohort                              | Available through request on dbGAP? | Study website                                                                                                                                                                                                                                                                                                                                       | Study contact (study email)                                                                                |
|-------------------------------------|-------------------------------------|-----------------------------------------------------------------------------------------------------------------------------------------------------------------------------------------------------------------------------------------------------------------------------------------------------------------------------------------------------|------------------------------------------------------------------------------------------------------------|
| ACT                                 | No                                  | (ACT) <a href="http://www.groupehealthresearch.org/capabilities/clinic/clin_std.html#act">http://www.groupehealthresearch.org/capabilities/clinic/clin_std.html#act</a><br>(eMERGE) <a href="https://www.mc.vanderbilt.edu/victr/dcc/projects/acc/index.php/Main_Page">https://www.mc.vanderbilt.edu/victr/dcc/projects/acc/index.php/Main_Page</a> | Eric B. Larson, MD, MPH, MACP (larson.e@ghc.org)                                                           |
| ADCs                                | No                                  | (NACC) <a href="https://www.alz.washington.edu/">https://www.alz.washington.edu/</a><br>(NCRAD) <a href="http://ncrad.iu.edu/">http://ncrad.iu.edu/</a>                                                                                                                                                                                             | (NACC) Walter Kukull, PhD (naccmail@uw.edu)<br>(NCRAD) Tatiana Foroud, PhD (alzstudy@iupui.edu)            |
| MAYO                                | No                                  | <a href="http://mayoresearch.mayo.edu/mayo/research/alzheimers_center/">http://mayoresearch.mayo.edu/mayo/research/alzheimers_center/</a>                                                                                                                                                                                                           | Steven G. Younkin, MD, PhD (younkin.steven@mayo.edu)                                                       |
| MBB                                 | No                                  | <a href="http://brainbank.med.miami.edu/">http://brainbank.med.miami.edu/</a>                                                                                                                                                                                                                                                                       | Deborah Mash (dmash@med.miami.edu)                                                                         |
| NIA-LOAD                            | Yes                                 | <a href="http://www.niageneticsinitiative.org/">http://www.niageneticsinitiative.org/</a>                                                                                                                                                                                                                                                           | Richard Mayeux, MD, MSc (rpm2@columbia.edu)                                                                |
| OHSU                                | No                                  | <a href="http://www.ohsu.edu/xd/research/centers-institutes/neurology/alzheimers/research/data-tissue/biomarkers-genetics.cfm">http://www.ohsu.edu/xd/research/centers-institutes/neurology/alzheimers/research/data-tissue/biomarkers-genetics.cfm</a>                                                                                             | Patricia L. Kramer (kramer@ohsu.edu)                                                                       |
| ROSMAP                              | Yes                                 | <a href="https://www.radc.rush.edu/res/ext/docs/Rush_ADCC_Data_Sharing.html">https://www.radc.rush.edu/res/ext/docs/Rush_ADCC_Data_Sharing.html</a>                                                                                                                                                                                                 | David Bennett, MD (dbennett@rush.edu)<br>Data Sharing: Gregory Klein (Gregory_Klein@rush.edu)              |
| TGEN2                               | No                                  | <a href="http://www.tgen.org/research/index.cfm?pageid=1065">http://www.tgen.org/research/index.cfm?pageid=1065</a>                                                                                                                                                                                                                                 | Eric Reiman, MD (eric_reiman@tgen.org)                                                                     |
| UM/VU/MSSM                          | No                                  | <a href="http://www.hihg.org/">http://www.hihg.org/</a> (Contact Directly)                                                                                                                                                                                                                                                                          | Margaret A. Pericak-Vance, PhD<br>(mpericak@med.miami.edu)                                                 |
| UP                                  | No                                  | <a href="http://www.adrc.pitt.edu/neurocore.asp">http://www.adrc.pitt.edu/neurocore.asp</a> (Contact Directly)                                                                                                                                                                                                                                      | M. Ilyas Kamboh, PhD (kamboh@pitt.edu)                                                                     |
| <b>ADGC<br/>Neuropath<br/>Study</b> |                                     | (Main Study) <a href="http://alois.med.upenn.edu/adgc/">http://alois.med.upenn.edu/adgc/</a><br>(Dataset Access) <a href="http://www.niageneticsdata.org/">http://www.niageneticsdata.org/</a>                                                                                                                                                      | Gerard Schellenberg (gerardsc@mail.med.upenn.edu),<br>Data Sharing: Li-San Wang (lswang@mail.med.penn.edu) |

ACT: Adult Changes in Thought Study; ADC: Alzheimer’s Disease Center; MAYO: Mayo Clinic Alzheimer’s Disease Research Center; MBB: University of Miami Brain Endowment Bank; NIA-LOAD: National Institute on Aging Late-Onset Alzheimer’s Disease Family Study; OHSU: Oregon Health & Science University Alzheimer’s Disease Center; ROSMAP: Religious Orders Study and Memory and Aging Project; TGEN: Translational Genomics Research Institute; UM/VU/MSSM: University of Miami Hussman Institute for Human Genomics/Vanderbilt University Center for Human Genetics Research/Mount Sinai School of Medicine; UP: University of Pittsburgh Alzheimer’s Disease Research Center; ADGC: Alzheimer’s Disease Genetics Consortium; dbGAP: database of genotypes and phenotypes; eMERGE: electronic medical records and genomics; NACC: National Alzheimer’s Coordinating Center; NCRAD: National Cell Repository for Alzheimer’s Disease.
