# Supplementary material for: Genome-Wide Association Meta-analysis of Neuropathologic Features of Alzheimer's Disease and Related Dementias
Source: PubMed Central journal article supplement (PMC4154667; doi:10.1371/journal.pgen.1004606), 2014-09-04
Supplement: pgen.1004606.s039.pdf [file pgen.1004606.s039.pdf]

Table S17: Descriptive statistics of cohorts

## Case Sample Descriptives

|           | Case | Control | Female (%)  | AAO (SD)   | AAD (SD)   | APOE (**/*4/44) |
|-----------|------|---------|-------------|------------|------------|-----------------|
| ACT       | 63   | 116     | 43(68.3%)   | 84.67(5)   | 87.47(3.8) | 0.56/0.39/0.05  |
| ADCs      | 2301 | 141     | 1249(54.3%) | 72.86(7.4) | 81.42(7.5) | 0.33/0.51/0.16  |
| TGEN2     | 668  | 353     | 433(64.8%)  | 74.88(7.5) | 82.1(7.7)  | 0.35/0.49/0.17  |
| LOAD      | 424  | 45      | 276(65.1%)  | 74.13(7.1) | .          | 0.26/0.56/0.18  |
| MAYO      | 221  | 209     | 110(49.8%)  | 73.63(5.4) | .          | 0.40/0.45/0.15  |
| ROSMAP    | 148  | 80      | 99(66.9%)   | 85.12(6.6) | 90.02(6.0) | 0.59/0.39/0.02  |
| UPITT     | 211  | 2       | 121(57.3%)  | 71.01(6.6) | .          | 0.37/0.51/0.12  |
| UM/MASH   | 50   | 60      | 38(76.0%)   | 78.66(8.4) | 84.68(7.8) | 0.43/0.43/0.14  |
| OHSU      | 12   | 23      | 8(66.7%)    | 89.58(6.1) | 94.25(4.5) | 0.58/0.42/0.00  |
| UMVUMSS_B | 54   | 1       | 38(70.4%)   | 71.81(6.8) | 81.13(7.1) | 0.33/0.39/0.28  |
| UMVUMSS_C | 21   | 1       | 12(57.1%)   | 71.67(6.8) | 79.8(6.0)  | 0.33/0.48/0.19  |

## Control Sample Descriptives

|           | Case | Control | Female (%) | AAE (SD)    | AAD (SD)    | APOE (**/*4/44) |
|-----------|------|---------|------------|-------------|-------------|-----------------|
| ACT       | 63   | 116     | 67(57.8%)  | 82.96 (5.7) | 84.1(5.4)   | 0.81/0.19/0.00  |
| ADCs      | 2301 | 141     | 68(48.2%)  | 82.45(8.1)  | 82.52(8.3)  | 0.84/0.16/0.00  |
| TGEN2     | 668  | 353     | 170(48.2%) | 79.81(8.7)  | 79.81(8.7)  | 0.79/0.20/0.02  |
| LOAD      | 424  | 45      | 29(64.4%)  | 86.67(7.4)  | .           | 0.84/0.13/0.02  |
| MAYO      | 221  | 209     | 79(37.8%)  | 71.64(5.6)  | .           | 0.74/0.25/0.01  |
| ROSMAP    | 148  | 80      | 52(65.0%)  | 84.25(6.4)  | 85.57(6.5)  | 0.94/0.05/0.01  |
| UPITT     | 211  | 2       | .          | .           | .           | .               |
| UM/MASH   | 50   | 60      | 28(46.7%)  | 79.08(14.1) | 79.08(14.1) | 0.87/0.13/0.00  |
| OHSU      | 12   | 23      | 15(65.2%)  | 89.52(8.1)  | 89.52(8.1)  | 0.90/0.10/0.00  |
| UMVUMSS_B | 54   | 1       | .          | .           | .           | .               |
| UMVUMSS_C | 21   | 1       | .          | .           | .           | .               |

AAO: age at onset; AAD: age at death; AAE: age at exam; SD: standard deviation. APOE: relative frequency of APOE genotypes where \* represents E2 or E3.

ACT: Adult Changes in Thought Study; ADC: Alzheimer's Disease Center; TGEN: Translational Genomics Research Institute; LOAD: National Institute on Aging Late-Onset Alzheimer's Disease Family Study; MAYO: Mayo Clinic Alzheimer's Disease Research Center; ROSMAP: Religious Orders Study and Memory and Aging Project; UPITT: University of Pittsburgh Alzheimer's Disease Research Center; UM/MASH: University of Miami Brain Endowment Bank; OHSU: Oregon Health & Science University Alzheimer's Disease Center; UM/VU/MSSM: University of Miami Hussman Institute for Human Genomics/Vanderbilt University Center for Human Genetics Research/Mount Sinai School of Medicine.
