# Supplementary material for: Genome-Wide Association Meta-analysis of Neuropathologic Features of Alzheimer's Disease and Related Dementias
Source: PubMed Central journal article supplement (PMC4154667; doi:10.1371/journal.pgen.1004606), 2014-09-04
Supplement: pgen.1004606.s040.pdf [file pgen.1004606.s040.pdf]

Table S18: Sample size and cohort inclusion by phenotype

| Cohort       | Platform         | Primary     |             | Total       | Complete    |            | Total       | NFT Braak (Ordinal-I) |            |            |            |            |             |
|--------------|------------------|-------------|-------------|-------------|-------------|------------|-------------|-----------------------|------------|------------|------------|------------|-------------|
|              |                  | Case        | Control     |             | Case        | Control    |             | 0                     | I          | II         | III        | IV         | V           |
| ACT          | Illumina 660     | 63          | 116         | 179         | 63          | 116        | 179         | 13                    | 39         | 63         | 54         | 34         | 33          |
| ADC          | Illumina 660     | 2301        | 141         | 2442        | 2299        | 141        | 2440        | 22                    | 62         | 63         | 170        | 371        | 806         |
| OHSU         | Illumina 300/370 | 12          | 23          | 35          | 12          | 23         | 35          | .                     | 7          | 7          | 5          | .          | 9           |
| MAYO         | Illumina 300/370 | 221         | 209         | 430         | 221         | 209        | 430         | 39                    | 51         | 94         | 32         | 11         | 71          |
| MBB          | Affy 6.0         | 50          | 60          | 110         | .           | .          | .           | .                     | 11         | 6          | 17         | 13         | 18          |
| NIA-LOAD     | Illumina 610     | 424         | 45          | 469         | 201         | 31         | 232         | .                     | 12         | 15         | 24         | 32         | 71          |
| ROSMAP       | Affy 6.0         | 148         | 80          | 228         | 148         | 80         | 228         | .                     | 22         | 31         | 75         | 87         | 99          |
| TGEN2        | Affy 6.0         | 668         | 353         | 1021        | 100         | 58         | 158         | 26                    | 81         | 66         | 18         | 36         | 172         |
| UMVUMSS(I)   | Illumina 610     | .           | .           | .           | .           | .          | .           | .                     | 5          | .          | .          | 10         | 15          |
| UMVUMSS(II)  | Illumina 1M      | .           | .           | .           | .           | .          | .           | .                     | .          | .          | .          | .          | .           |
| UP           | Illumina 1M      | .           | .           | .           | .           | .          | .           | .                     | .          | 6          | 16         | 41         | 60          |
| <b>TOTAL</b> | <b>n/a</b>       | <b>3887</b> | <b>1027</b> | <b>4914</b> | <b>3044</b> | <b>658</b> | <b>3702</b> | <b>100</b>            | <b>290</b> | <b>351</b> | <b>411</b> | <b>635</b> | <b>1354</b> |

A missing point (".") indicates the category had fewer than 5 observations and was not included in the analysis. A cohort must have 5 observations in two or more categories to be included in a particular analysis. Ordinal traits were coded in the order listed here.

ACT: Adult Changes in Thought Study; ADC: Alzheimer's Disease Center; OHSU: Oregon Health & Science University Alzheimer's Disease Center; MAYO: Mayo Clinic Alzheimer's Disease Research Center; MBB: University of Miami Brain Endowment Bank; NIA-LOAD: National Institute on Aging Late-Onset Alzheimer's Disease Family Study; ROSMAP: Religious Orders Study and Memory and Aging Project; TGEN: Translational Genomics Research Institute; UM/VU/MSSM: University of Miami Hussman Institute for Human Genomics/Vanderbilt University Center for Human Genetics Research/Mount Sinai School of Medicine; UP: University of Pittsburgh Alzheimer's Disease Research Center.

| VI   | Total | NFT Braak (Ordinal-II) |      |        |      | Total | Neuritic Plaque (Ordinal) |        |          |          | Total | Neuritic Plaque |      | Total |
|------|-------|------------------------|------|--------|------|-------|---------------------------|--------|----------|----------|-------|-----------------|------|-------|
|      |       | 0                      | I-II | III-IV | V-VI |       | None                      | Sparse | Moderate | Frequent |       | None            | Any  |       |
| 36   | 272   | 13                     | 102  | 88     | 69   | 272   | 70                        | 78     | 69       | 55       | 272   | 70              | 202  | 272   |
| 990  | 2484  | 22                     | 125  | 541    | 1796 | 2484  | 98                        | 73     | 432      | 1883     | 2486  | 98              | 2388 | 2486  |
| 5    | 33    | .                      | 14   | 7      | 14   | 35    | 19                        | 5      | .        | 13       | 37    | 19              | 19   | 38    |
| 139  | 437   | 39                     | 145  | 43     | 210  | 437   | 198                       | 20     | 6        | 213      | 437   | 198             | 239  | 437   |
| 7    | 72    | .                      | 17   | 30     | 25   | 72    | 45                        | 19     | 27       | 13       | 104   | 45              | 59   | 104   |
| 123  | 277   | .                      | 27   | 56     | 194  | 277   | 34                        | 12     | 27       | 134      | 207   | 34              | 173  | 207   |
| 7    | 321   | .                      | 53   | 162    | 106  | 321   | 119                       | 10     | 62       | 133      | 324   | 119             | 205  | 324   |
| 182  | 581   | 26                     | 147  | 54     | 354  | 581   | 37                        | 33     | 15       | 93       | 178   | 37              | 141  | 178   |
| 11   | 41    | .                      | 8    | 13     | 26   | 47    | .                         | .      | .        | .        | .     | .               | .    | .     |
| .    | .     | .                      | .    | 10     | 7    | 17    | .                         | .      | .        | .        | .     | .               | .    | .     |
| 66   | 189   | .                      | 9    | 57     | 126  | 192   | .                         | .      | 12       | 175      | 187   | .               | .    | .     |
| 1566 | 4707  | 100                    | 647  | 1061   | 2927 | 4735  | 620                       | 250    | 650      | 2712     | 4232  | 620             | 3426 | 4046  |

| Lewy Body (Ordinal-I) |           |              |         |       | Total | Lewy Body |      | Total | Lewy Body (Ordinal-II) |           |                                 | Total |
|-----------------------|-----------|--------------|---------|-------|-------|-----------|------|-------|------------------------|-----------|---------------------------------|-------|
| None                  | Brainstem | Transitional | Diffuse | Other |       | None      | Any  |       | None                   | Brainstem | Transitional,<br>Diffuse, Other |       |
| 208                   | 7         | 26           | 9       | .     | 250   | 208       | 43   | 251   | 208                    | 7         | 36                              | 251   |
| 1525                  | 70        | 189          | 287     | 165   | 2236  | 1525      | 711  | 2236  | 1525                   | 70        | 641                             | 2236  |
| .                     | .         | .            | .       | .     | .     | .         | .    | .     | .                      | .         | .                               | .     |
| 281                   | 21        | 36           | 64      | 35    | 437   | 281       | 156  | 437   | 281                    | 21        | 135                             | 437   |
| .                     | .         | .            | .       | .     | .     | .         | .    | .     | .                      | .         | .                               | .     |
| 104                   | .         | 30           | 31      | .     | 170   | 104       | 66   | 170   | 104                    | 2         | 64                              | 170   |
| 248                   | 13        | 22           | 41      | .     | 324   | 248       | 76   | 324   | 248                    | 13        | 63                              | 324   |
| .                     | .         | .            | .       | .     | .     | .         | .    | .     | .                      | .         | .                               | .     |
| .                     | .         | .            | .       | .     | .     | .         | .    | .     | .                      | .         | .                               | .     |
| .                     | .         | .            | .       | .     | .     | .         | .    | .     | .                      | .         | .                               | .     |
| 25                    | .         | 50           | 33      | .     | 108   | 25        | 83   | 108   | 25                     | .         | 83                              | 108   |
| 2391                  | 111       | 353          | 465     | 200   | 3525  | 2391      | 1135 | 3526  | 2391                   | 113       | 1022                            | 3526  |

| Vascular Brain Injury |     | Total | Vascular Brain Injury (Ordinal) |               |                          | Total | Medial Temporal Sclerosis |     | Total | Amyloid Angiopathy |      | Total |
|-----------------------|-----|-------|---------------------------------|---------------|--------------------------|-------|---------------------------|-----|-------|--------------------|------|-------|
| None                  | Any |       | None                            | Microinfarcts | Large infarct or Lacunes |       | None                      | Any |       | None               | Any  |       |
| 115                   | 142 | 257   | 115                             | 27            | 115                      | 257   | 236                       | 17  | 253   | 197                | 73   | 270   |
| 1439                  | 756 | 2195  | 1439                            | 219           | 537                      | 2195  | 1928                      | 201 | 2129  | 767                | 1431 | 2198  |
| 14                    | 16  | 30    | 14                              | .             | 12                       | 26    | .                         | .   | .     | 22                 | 10   | 32    |
| .                     | .   | .     | .                               | .             | .                        | .     | .                         | .   | .     | .                  | .    | .     |
| 106                   | 24  | 130   | 106                             | 9             | 15                       | 130   | .                         | .   | .     | 122                | 8    | 130   |
| .                     | .   | .     | .                               | .             | .                        | .     | .                         | .   | .     | .                  | .    | .     |
| .                     | .   | .     | .                               | 34            | 146                      | 180   | 255                       | 67  | 322   | 5                  | 13   | 18    |
| .                     | .   | .     | .                               | .             | .                        | .     | .                         | .   | .     | .                  | .    | .     |
| .                     | .   | .     | .                               | .             | .                        | .     | .                         | .   | .     | .                  | .    | .     |
| .                     | .   | .     | .                               | .             | .                        | .     | .                         | .   | .     | .                  | .    | .     |
| 98                    | 54  | 152   | 98                              | 22            | 32                       | 152   | 157                       | 25  | 182   | 21                 | 138  | 159   |
| 1772                  | 992 | 2764  | 1772                            | 311           | 857                      | 2940  | 2576                      | 310 | 2886  | 1134               | 1673 | 2807  |
